# Supplementary material for: A pluripotent stem cell-based model for post-implantation human amniotic sac development
Source: PubMed Central journal article supplement (PMC5547056; doi:10.1038/s41467-017-00236-w), 2017-08-08
Supplement: 41467_2017_236_MOESM1_ESM.pdf [file 41467_2017_236_MOESM1_ESM.pdf]

1 File Name: Supplementary Information  
2 Description: Supplementary Figures, Supplementary Tables, Supplementary References.  
3  
4 File Name: Supplementary Movie 1  
5 Description: Representative time-lapse movie showing dynamic morphogenesis during the development  
6 of a PASE. Time stamps indicate the total hours of culture. Scale bar, 50  $\mu\text{m}$ . The same cyst is presented  
7 in Fig. 4a (with 180° rotation).  
8  
9 File Name: Supplementary Movie 2  
10 Description: Representative time-lapse movie showing the progressive emergence of the EMT and PS-  
11 like phenotype in a PASE. Time stamps indicate the total hours of culture. Scale bar, 50  $\mu\text{m}$ . The same  
12 cyst is presented in Fig. 5a (with 180° rotation).  
13  
14 File Name: Supplementary Movie 3  
15 Description: Representative time-lapse movie showing the initial development of an unstable  
16 asymmetric cyst and its subsequent conversion to a fully squamous cyst. Time stamps indicate the total  
17 hours of culture. Scale bar, 50  $\mu\text{m}$ . The same cyst is presented in Fig. 10a.  
18  
19 File Name: Supplementary Movie 4  
20 Description: Representative time-lapse movie showing the development of a squamous cyst through  
21 circumferential progressive squamous morphogenesis. Time stamps indicate the total hours of culture.  
22 Scale bar, 50  $\mu\text{m}$ . The same cyst is presented in Supplementary Fig. 13a.

23 **Supplementary Figures and Legends**  
24 **Supplementary Figure 1**

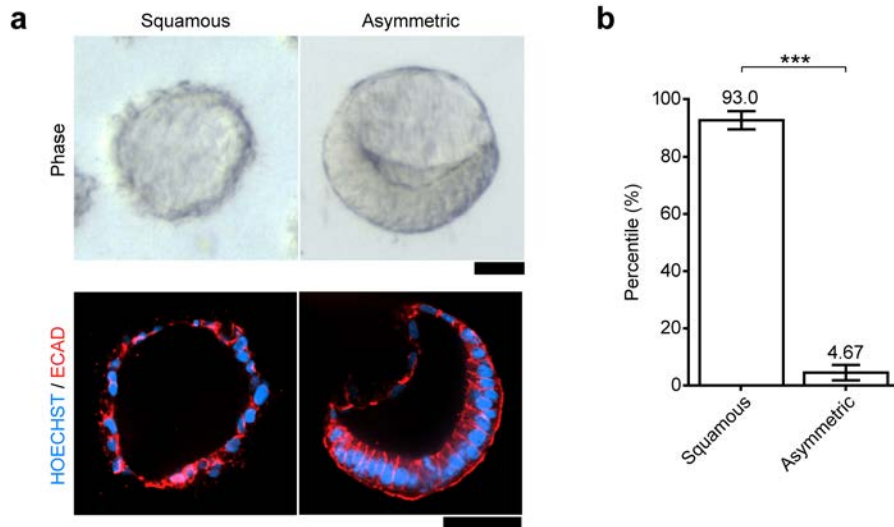

25  
26 **Supplementary Figure 1. hPSC form both squamous and asymmetric cysts in 3D culture.**  
27 **(a)** Representative phase contrast (top) and confocal immunofluorescence (bottom) micrographs  
28 showing a squamous cyst (left) and an asymmetric cyst (right) observed in the 3D culture system. Cysts  
29 were stained for ECAD (red). HOECHST (blue) counterstains nuclei.  $n = 5$  independent experiments.  
30 Scale bars, 50  $\mu\text{m}$ . **(b)** Bar plot showing percentages of squamous and asymmetric cysts in the 3D  
31 culture on day 5. hPSC were plated at 30,000 cells  $\text{cm}^{-2}$  at the beginning of culture.  $n = 3,662$  and 168  
32 for squamous and asymmetric cysts, respectively, out of a total of 3,948 cysts from  $n = 8$  biological  
33 replicates. Data represent the mean  $\pm$  s.d.  $P$ -values were calculated using paired, two-sided Student's  $t$ -  
34 test. \*\*\*:  $P < 0.001$ . The remaining 118 cysts exhibited a columnar morphology<sup>1</sup>. Asymmetric cyst  
35 formation was consistently observed in all experiments ( $n > 18$  independent experiments).

36 **Supplementary Figure 2**

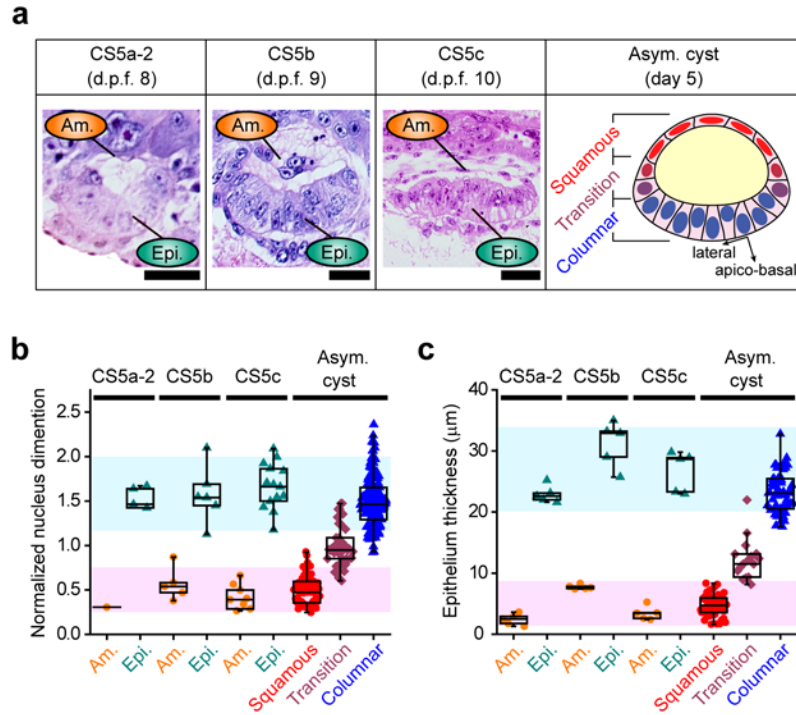

37

38 **Supplementary Figure 2. Asymmetric cysts morphologically resemble the human amniotic sac.**

39 (a) Comparison of Carnegie stage embryos to the asymmetric cyst (the embryo sections are the same as  
 40 those shown in **Fig. 1d**). The cartoon summarizes morphological patterning in the asymmetric cyst.  
 41 Scale bars, 30 µm. (b&c) Tissue/region-specific measurements of normalized nuclear dimension (*apico-*  
 42 *basal* : lateral dimension of nuclei) (b) and epithelium thickness (c) in human embryos and in the  
 43 asymmetric cyst as indicated. Box: 25-75%, bar-in-box: median, and whiskers: 1 and 99%. For embryos  
 44 measured in **b**,  $n = 1, 5,$  and  $8$  prospective/definitive amniotic ectoderm cells (Am.), and  $n = 4, 6,$  and  $14$   
 45 epiblast cells (Epi.), from CS5a-2, CS5b, and CS5c embryos shown in **a**, respectively, were analyzed.  
 46 Of note, since the CS5a-2 embryo does not show amniotic ectoderm cells as definitive as CS5b and  
 47 CS5c embryos do, we called the squamous portion at the roof of the CS5a-2 embryo "prospective  
 48 amniotic ectoderm" (labeled as "Am."), which appears to enclose the amniotic cavity with the epiblast at  
 49 the floor. For asymmetric cysts measured in **b**,  $n = 68$  squamous,  $47$  transitional, and  $143$  columnar cells,

50 from  $n = 12$  cysts, were analyzed. Each dot represents a single cell in **b**. For the CS5a-2, CS5b, and  
51 CS5c embryos measured in **c**, 5 measurements were performed for amniotic and epiblast regions,  
52 respectively, for each embryo section shown in **a**. For asymmetric cysts measured in **c**, 5 measurements  
53 were conducted for each cyst at 5 evenly distributed locations, which are subsequently grouped to  
54 specific regions per definition shown in **a**. Each measurement was plotted as a single dot in **c**.

55

56

57

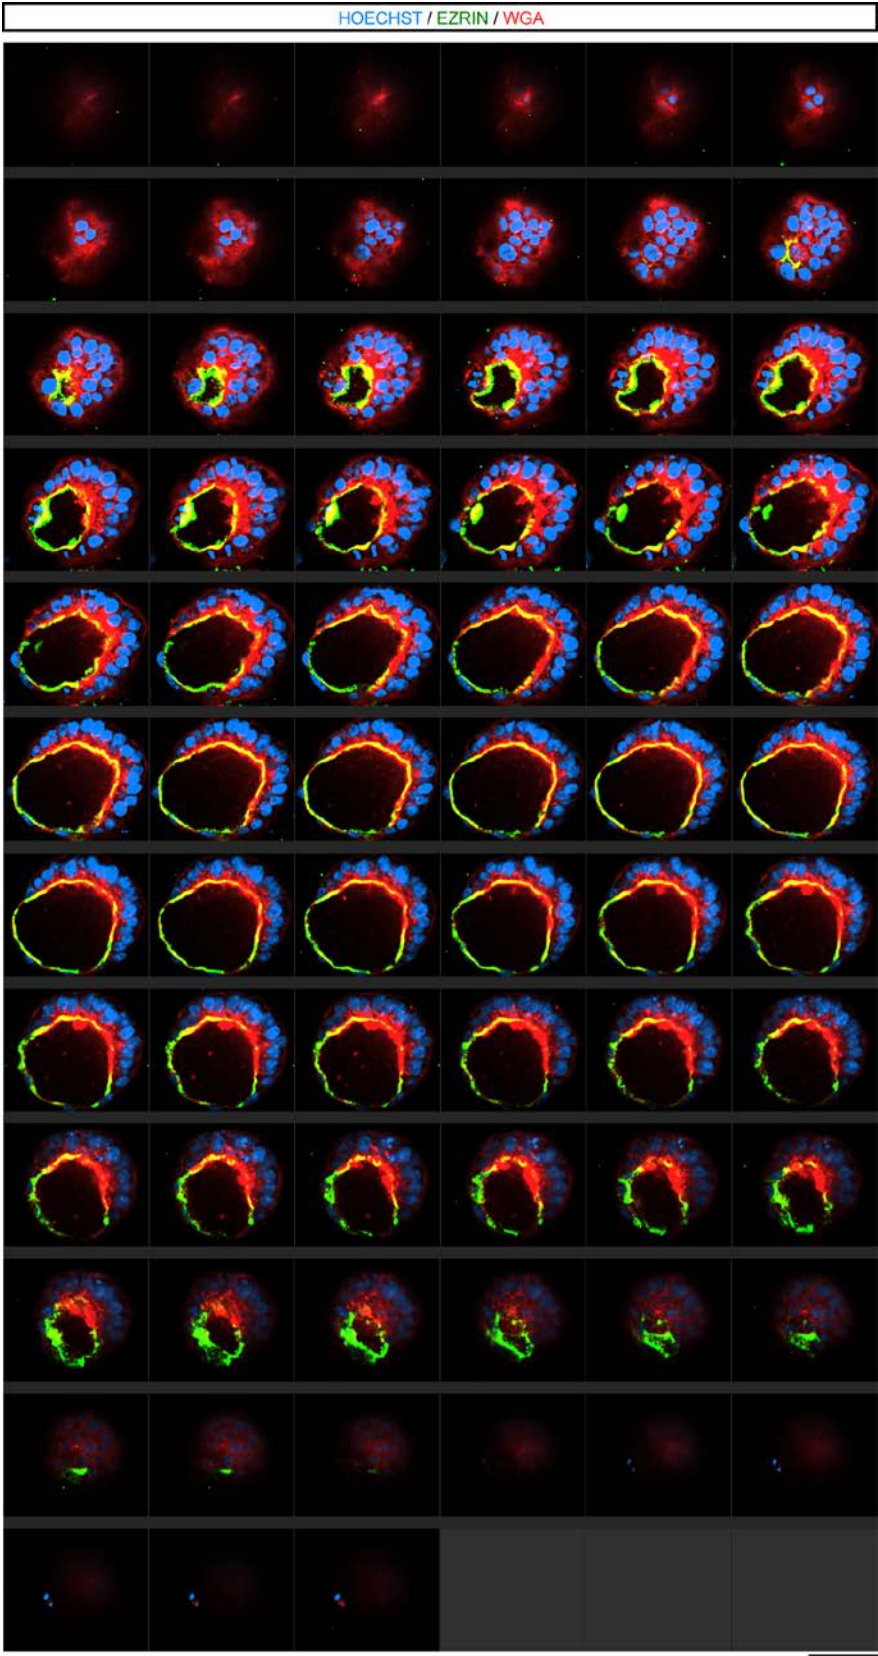

60 **Supplementary Figure 3. Full Z-stack confocal micrographs of an asymmetric cyst.**

61 A representative asymmetric cyst on day 5 was stained for EZRIN (green) and WGA (red). A bipolar  
62 pattern of cell morphology is visible and a continuous EZRIN<sup>+</sup>, WGA-enriched single apical lumen that  
63 faces inward can be seen throughout the cyst. HOECHST (blue) counterstains nuclei. *n* = 5 independent  
64 experiments. Scale bar, 50  $\mu$ m.

65

66 **Supplementary Figure 4**

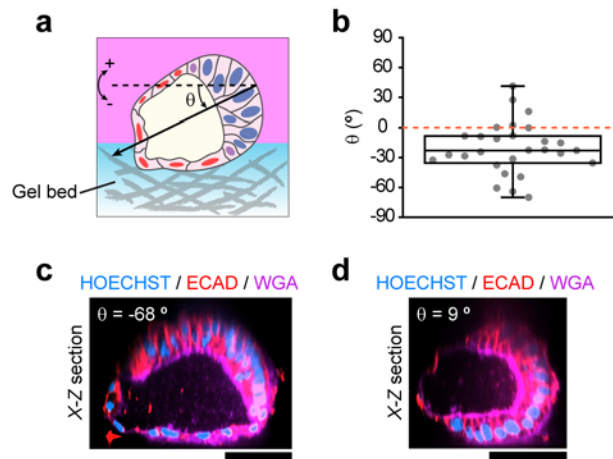

67

68 **Supplementary Figure 4. Vertical orientation of the asymmetric cyst.**

69 (a) Schematic showing the definition of cyst orientation angle  $\theta$ , which is negative when the squamous  
70 side of the cyst is closer to the gel bed. (b) Quantitated cyst orientation angle  $\theta$  from  $n = 28$  cysts. Box:  
71 25-75%, bar-in-box: median, and whiskers: 1 and 99%. Baseline of  $\theta = 0^\circ$  is drawn (red dashed line) for  
72 reference. (c&d) X-Z confocal sections showing representative cysts stained for ECAD (red) and WGA  
73 (purple), with cyst orientation angle  $\theta = -68^\circ$  (c) and  $9^\circ$  (d), respectively. HOECHST counterstains  
74 nuclei.  $n = 5$  independent experiments. Scale bars,  $50 \mu\text{m}$ .

75

76 **Supplementary Figure 5**

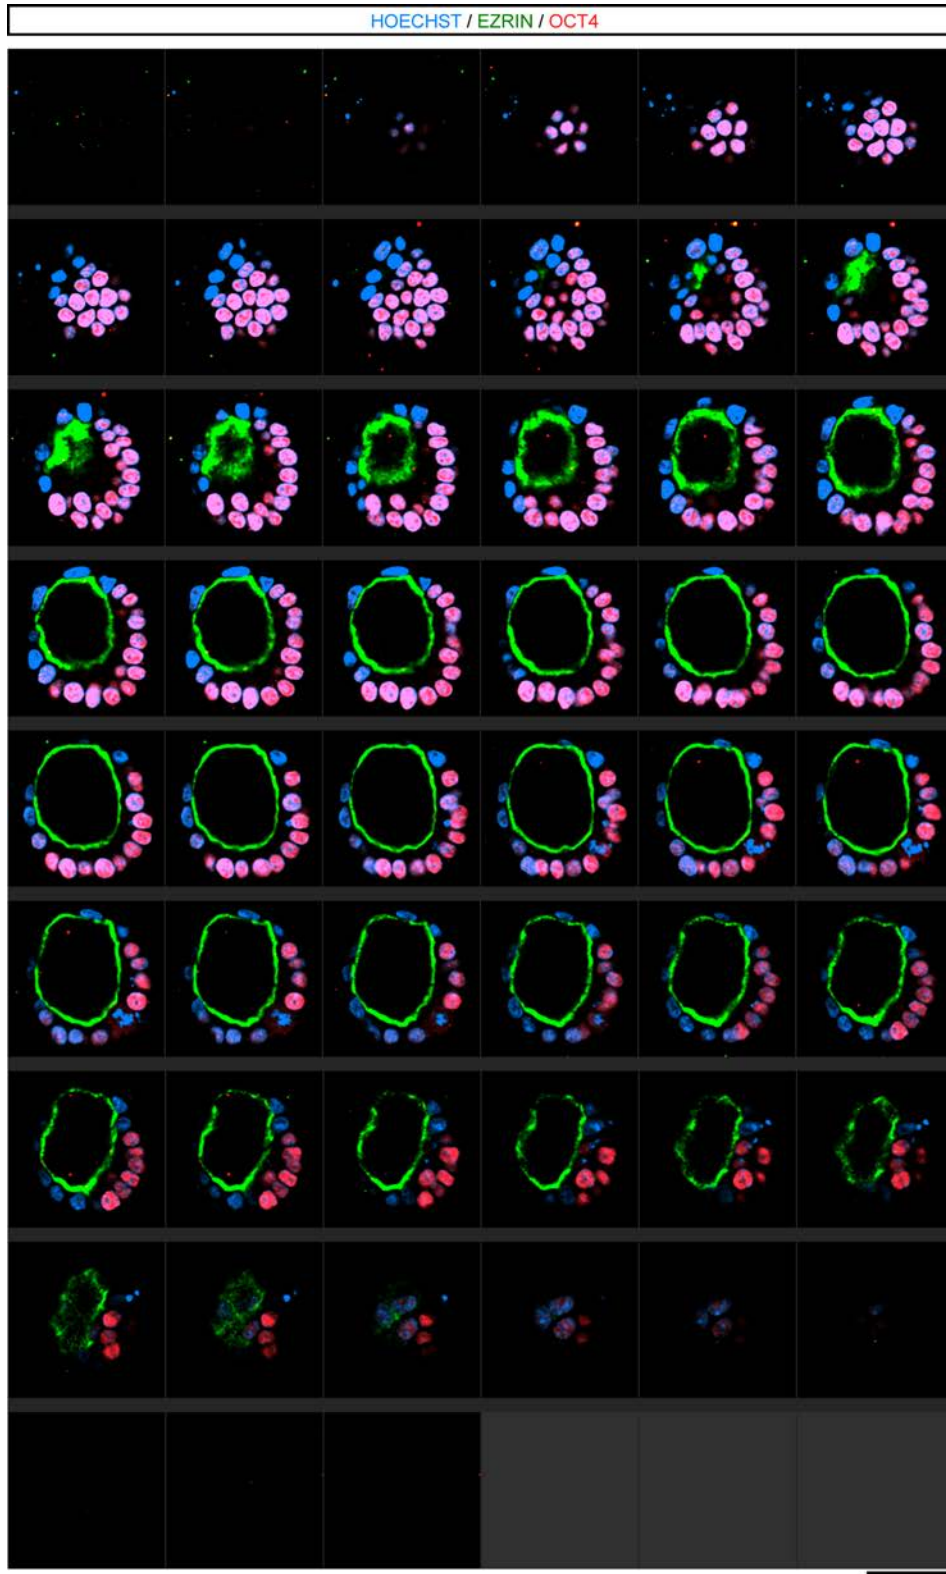



79 **Supplementary Figure 5. Full Z-stack of confocal micrographs showing an embryonic disc-like**  
80 **structure in the asymmetric cyst.**

81 This representative asymmetric cyst (same as shown in **Fig. 3a**) was stained for EZRIN (green) and  
82 OCT4 (red). HOECHST (blue) counterstains nuclei. Nuclear staining of OCT4 is only prominent in the  
83 thick, columnar side of the cyst, and is lost in the flattened squamous side, consistent with the notion  
84 that the columnar side represents an embryonic disc-like structure. Scale bar, 50  $\mu\text{m}$ .

85

86

87 **Supplementary Figure 6**

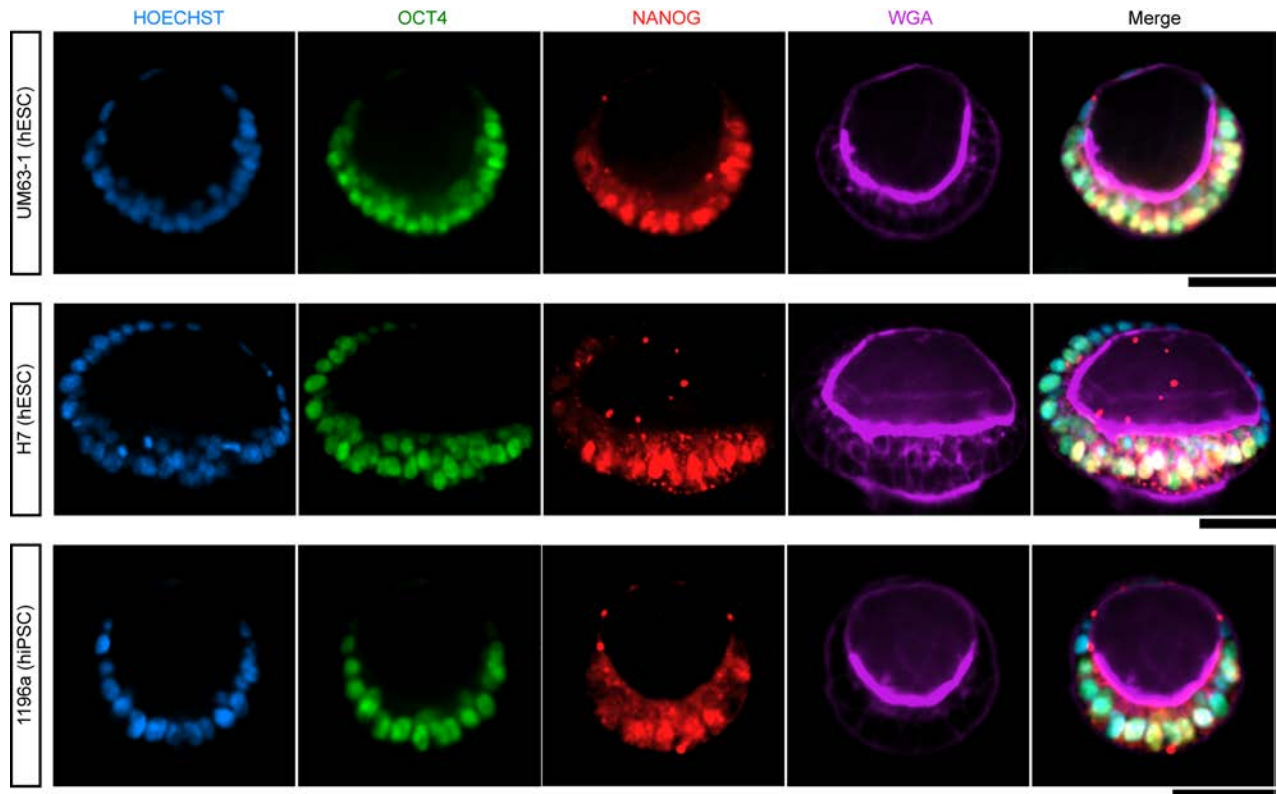

88

89 **Supplementary Figure 6. Generation of asymmetric cysts using multiple hPSC lines.**

90 Representative confocal micrographs showing asymmetric cysts derived from two hESC lines (UM63-1,  
91 top; H7, middle), and one hiPSC line (1196a, bottom) on day 5 as indicated. The cysts were stained for  
92 OCT4 (green), NANOG (red) and WGA (purple). HOECHST counterstains nuclei.  $n = 2$  independent  
93 experiments for each hPSC line. Scale bars, 50  $\mu\text{m}$ .

94

95 **Supplementary Figure 7**

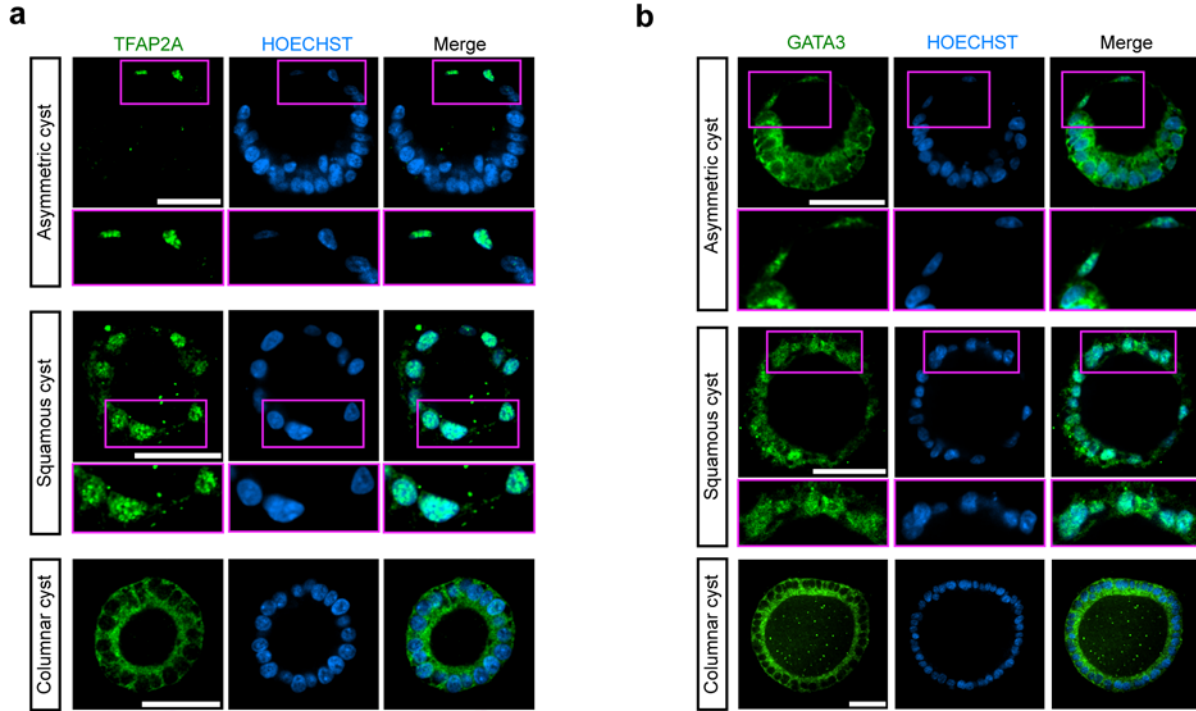

96

97 **Supplementary Figure 7. Examination of amniotic markers in the squamous cells.**

98 (a) Representative confocal micrographs showing an asymmetric cyst (top; same as shown in **Fig. 3d**), a  
99 squamous cyst (middle), and a columnar cyst (bottom). Cysts were stained for TFAP2A (green).

100 HOECHST (blue) counterstains nuclei. Zoom-in images are shown for the boxed regions at the amniotic  
101 pole. The asymmetric cyst and the squamous cyst were generated in the 3D amniogenic culture system.

102 The columnar cyst was generated in Glass-3D culture system<sup>1</sup>.  $n = 3$  independent experiments. Scale

103 bars, 50 μm. (b) Representative confocal micrographs showing an asymmetric cyst (top; same as shown

104 in **Fig. 3e**), a squamous cyst (middle), and a columnar cyst (bottom). Cysts were stained for GATA3

105 (green). HOECHST (blue) counterstains nuclei. Zoom-in images are shown for the boxed regions at the

106 amniotic pole. The asymmetric cyst and the squamous cyst were generated in the 3D amniogenic culture

107 system. The columnar cyst was generated in Glass-3D culture system<sup>1</sup>.  $n = 2$  independent experiments.

108 Scale bars, 50 μm.

109

110 **Supplementary Figure 8**

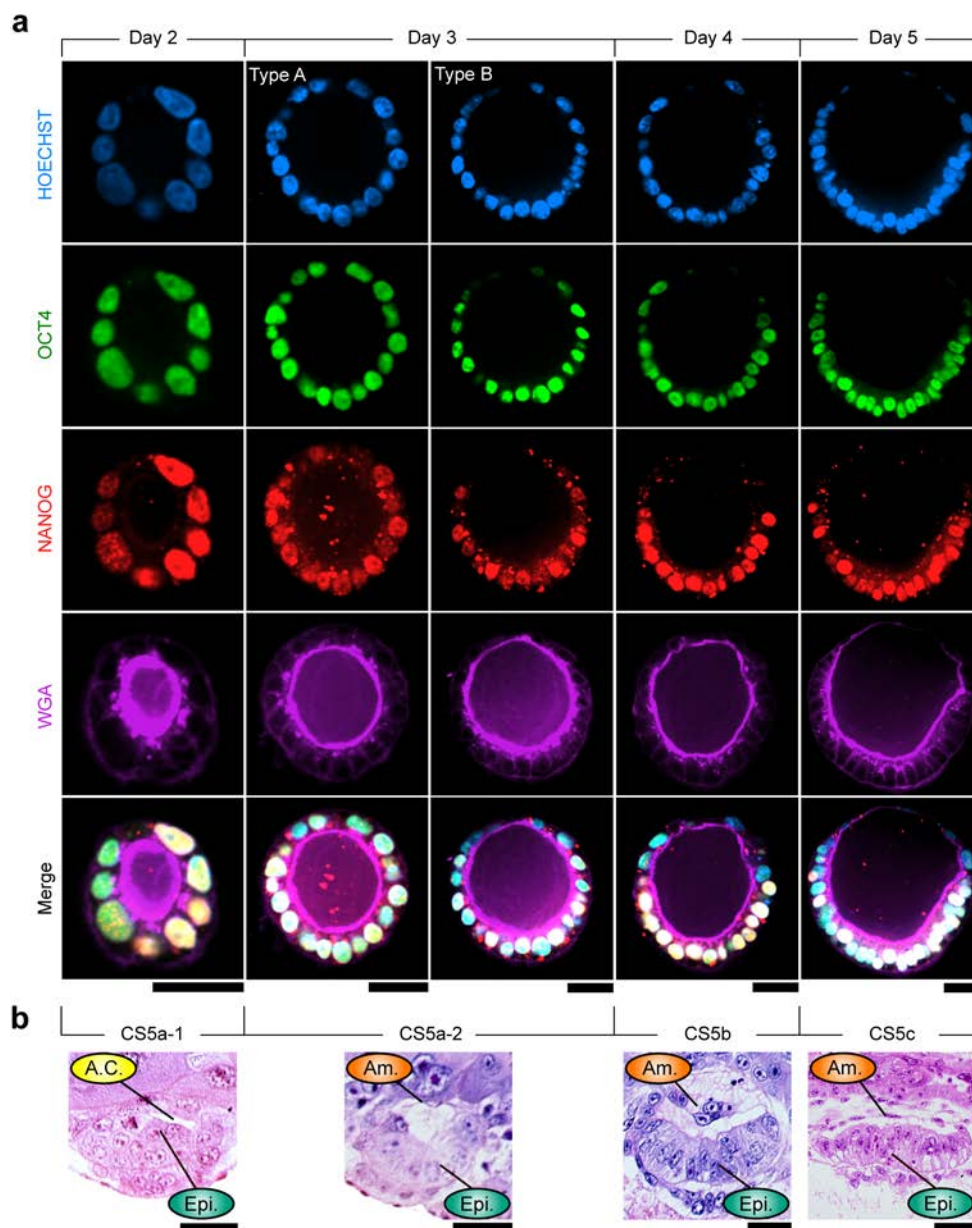

111

112 **Supplementary Figure 8. Temporal evolution of PASE development.**

113 (a) Representative confocal micrographs showing PASE from day 2-5 (as shown in Fig. 4b), stained for  
 114 OCT4 (green), NANOG (red), and WGA (purple). HOECHST (blue) counterstains nuclei. Since nuclear  
 115 staining of NANOG typically exhibits heterogeneous intensity in cultured hPSC, only cells in which  
 116 nuclear staining of NANOG is completely absent were considered to have lost NANOG expression.

117 Scale bars, 30  $\mu$ m. (b) Sections of Carnegie stage (CS) 5a-1<sup>2</sup>, 5a-2<sup>3</sup>, 5b<sup>2</sup>, and 5c<sup>4</sup> human embryos at d.p.f.

118 7, 8, 9, and 12, respectively, which spans from peri- to post-implantation developmental stages. Sections  
119 were obtained from the Virtual Human Embryo Project. The sections of CS5a-2, CS5b, and CS5c  
120 embryos are the same as shown in **Fig. 1d**. A.C.: pro-amniotic cavity; Am.: (prospective) amniotic  
121 ectoderm; Epi.: epiblast. Scale bars, 30  $\mu\text{m}$ .

122

123 **Supplementary Figure 9**

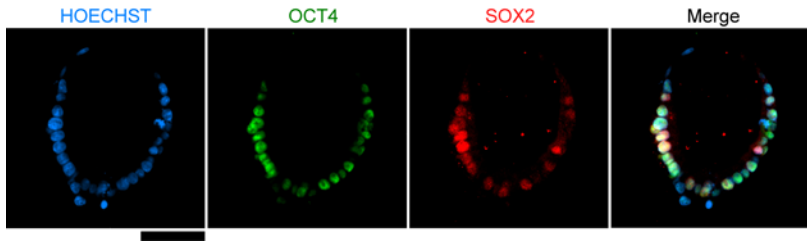

124

125 **Supplementary Figure 9. SOX2 expression is decreased in disseminating cells.**

126 Representative confocal micrographs showing a day 5 PASE that exhibits an EMT phenotype on the  
127 columnar side, stained for OCT4 (green) and SOX2 (red). HOECHST (blue) counterstains nuclei.  $n = 3$   
128 independent experiments. Scale bar, 50  $\mu\text{m}$ .

129

130

131 **Supplementary Figure 10**

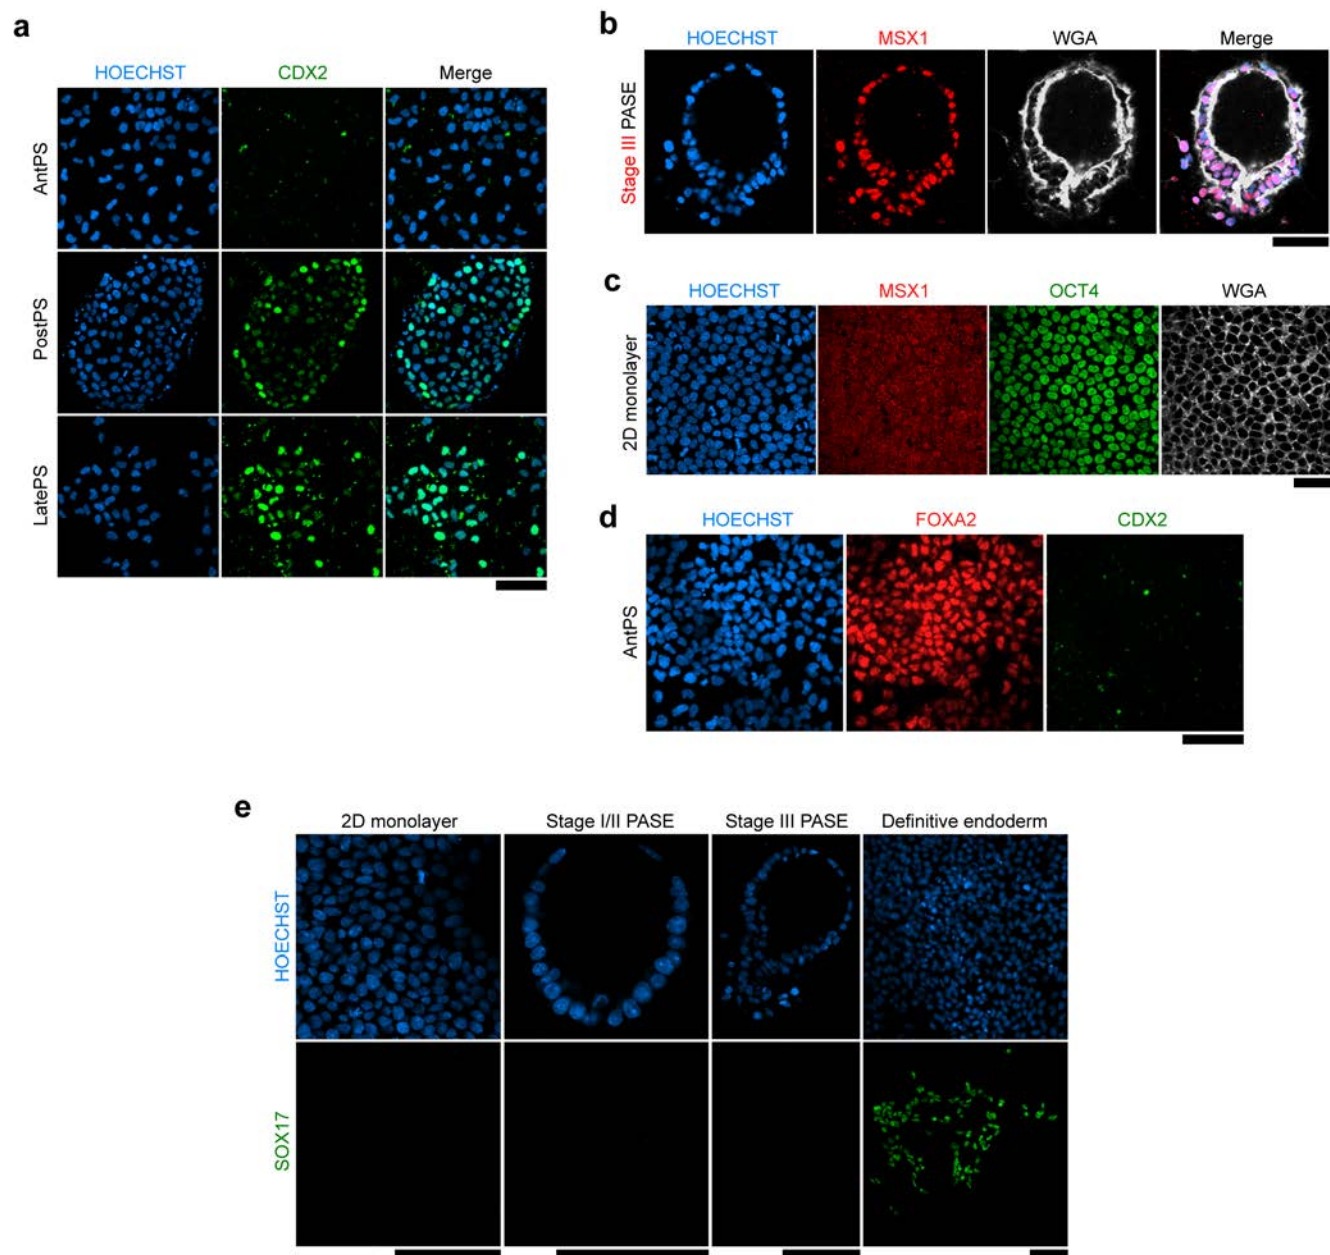

132

133 **Supplementary Figure 10. Characterization of primitive streak markers in PASE.**

134 (a) Representative confocal micrographs showing anterior primitive streak (AntPS; top), posterior  
 135 primitive streak (PostPS; middle), and late primitive streak (LatePS; bottom) cells derived from hPSC in  
 136 2D culture, stained for CDX2 (green). HOECHST (blue) counterstains nuclei.  $n = 2$  independent  
 137 experiments. Scale bar, 100  $\mu\text{m}$ . (b) Representative confocal micrographs showing a stage III stained for

138 MSX1 (red). WGA (white) co-staining shows cell membrane. HOECHST (blue) counterstains nuclei. *n*  
139 = 2 independent experiments. Scale bar, 50  $\mu$ m. **(c)** Representative confocal micrographs showing  
140 undifferentiated hPSC stained for MSX1 (red) and OCT4 (green) under standard 2D monolayer culture,  
141 where MSX1 is known to be not expressed<sup>1</sup>. WGA (white) co-staining shows the cell membrane.  
142 HOECHST (blue) counterstains nuclei. *n* = 2 independent experiments. Scale bar, 50  $\mu$ m. **(d)**  
143 Representative confocal micrographs showing AntPS cells, stained for FOXA2 (red), and CDX2 (green).  
144 HOECHST (blue) counterstains nuclei. *n* = 2 independent experiments. Scale bar, 100  $\mu$ m. **(e)**  
145 Representative confocal micrographs showing undifferentiated 2D hPSC monolayer, stage I/II PASE,  
146 stage III PASE, and hPSC-derived definitive endoderm cells, respectively, stained for SOX17 (green).  
147 HOECHST (blue) counterstains nuclei. hPSC-derived definitive endoderm cells, which are known to  
148 express SOX17, were derived by following an established protocol<sup>5</sup>. *n* = 2 independent experiments.  
149 Scale bar, 100  $\mu$ m.  
150



151 **Supplementary Figure 11**

**a**  
Human *SNAI1* exon 1:  
ATGCCGCGCTCTTTCCTCGTCAGGAAG  
CCCTCCGACCCCAATCGGAAGCCTAAC  
TACAGCGAGCTGCAGGACTCTAATCCAG  
(Green: PAM Red: Target sequence)

**b**

|                     |                                                                                                                    |
|---------------------|--------------------------------------------------------------------------------------------------------------------|
| <i>SNAI1</i> -WT    | 1. AGCCCTCCGACC-CCAATCGGAAGCCTAACTACAGC<br>2. AGCCCTCCGACC-CCAATCGGAAGCCTAACTACAGC                                 |
| <i>SNAI1</i> -KO #1 | 1. AGCCCTCCGACCTCCAATCGGAAGCCTAACTACAGC (1bp insertion)<br>2. AGCCCTCCGACCCCAATCGGAAGCCTAACTACAGC (1bp insertion)  |
| <i>SNAI1</i> -KO #2 | 1. AGCCCTCCGACC---AATCGGAAGCCTAACTACAGC (2 bp deletion)<br>2. AGCCCTCCGACC---AATCGGAAGCCTAACTACAGC (2 bp deletion) |
| <i>SNAI1</i> -KO #3 | 1. AGCCCTCCGACC---AATCGGAAGCCTAACTACAGC (2 bp deletion)<br>2. AGCCCTCCGACC---AATCGGAAGCCTAACTACAGC (2 bp deletion) |

152  
153 **Supplementary Figure 11. Design and validation of *SNAI1*-KO.**

154 (a) Sequence of exon 1 in human *SNAI1*. The PAM sequence recognized by the guide RNA (gRNA) is  
155 highlighted in green. The 20 base-pair (bp) target sequence is highlighted in red. (b) Sequencing of  
156 *SNAI1* wild type (*SNAI1*-WT) and three separate *SNAI1*-KO lines, showing frame-shift mutations  
157 caused by 1 bp insertion (#1) and 2 bp deletion (#2 and #3).

158

159 **Supplementary Figure 12**

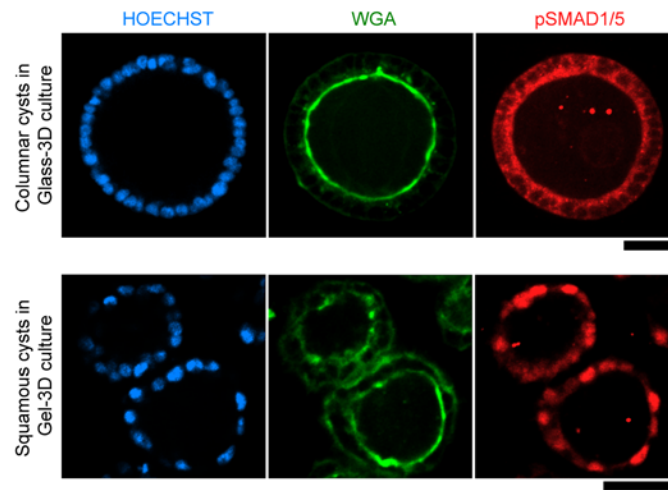

160

161 **Supplementary Figure 12. Control assay to ascertain pSMAD1/5 antibody specificity.**

162 Representative confocal micrographs showing columnar pluripotent cysts<sup>1</sup> formed in Glass-3D (upper)  
163 and squamous amniotic cysts<sup>1</sup> formed in Gel-3D (lower) on day 5, stained for pSMAD1/5 (red). WGA  
164 (green) stains cell membrane. HOECHST (blue) counterstains nuclei. *n* = 2 independent experiments.

165 Scale bars, 50  $\mu$ m.

166

167 **Supplementary Figure 13**

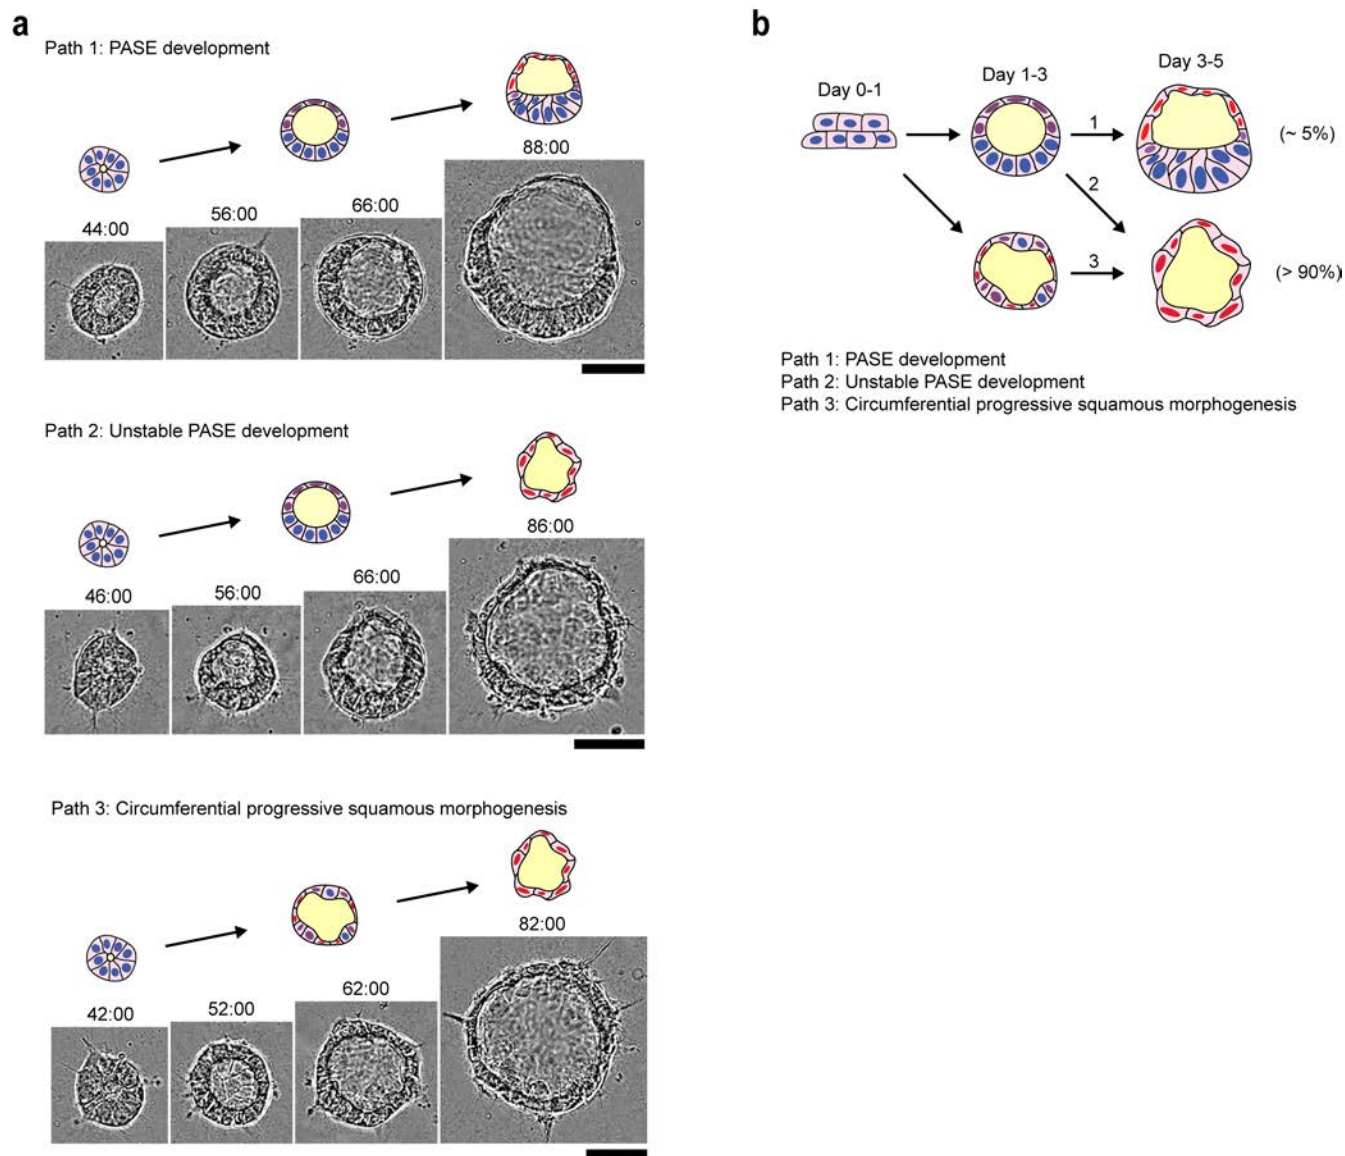

168

169 **Supplementary Figure 13. Distinct developmental pathways for PASE vs. squamous tissues.**

170 (a) Representative time-lapse sequences showing stable PASE development (Path 1; same sequence as  
 171 shown in **Fig. 4a**); unstable PASE development (Path 2; same sequence as shown in **Fig. 10a**); and  
 172 circumferential progressive squamous morphogenesis (Path 3; also see **Supplementary Movie 4**). Path  
 173 1 leads to stable PASE formation while Paths 2&3 lead to fully squamous amniotic ectoderm-like cyst  
 174 formation. Of note, all three pathways start from uniformly columnar cysts.  $n = 3$  independent  
 175 experiments. Scale bars, 50  $\mu\text{m}$ . (b) Schematic summarizing the developmental pathways towards PASE

176 vs. squamous amniotic ectoderm-like cysts in the current system.

177 **Supplementary Tables**178 **Supplementary Table 1. List of primary antibodies.**

| <b>Protein</b>    | <b>Species</b> | <b>Application</b> | <b>Catalog No.</b> | <b>Vendor</b>                           |
|-------------------|----------------|--------------------|--------------------|-----------------------------------------|
| <b>E-CADHERIN</b> | Mouse          | 1:500 (ICC)        | 610181             | BD Biosciences                          |
| <b>E-CADHERIN</b> | Rabbit         | 1:100 (ICC)        | ab15148            | Abcam                                   |
| <b>β-CATENIN</b>  | Mouse          | 1:200 (ICC)        | 610153             | BD Biosciences                          |
| <b>EZRIN</b>      | Mouse          | 1:2000 (ICC)       | E8897              | Sigma-Aldrich                           |
| <b>OCT4</b>       | Mouse          | 1:200 (ICC)        | SC-5279            | Santa-Cruz Biotechnology                |
| <b>OCT4</b>       | Rabbit         | 1:500 (ICC)        | 2750               | Cell Signaling Technology               |
| <b>NANOG</b>      | Rabbit         | 1:500 (ICC)        | 4903S              | Cell Signaling Technology               |
| <b>SOX2</b>       | Rabbit         | 1:1000 (ICC)       | 09-0024            | Stemgent                                |
| <b>TFAP2A</b>     | Mouse          | 1:100 (ICC)        | 3B5                | Developmental Studies<br>Hybridoma Bank |
| <b>GATA3</b>      | Mouse          | 1:100 (ICC)        | SC-268             | Santa-Cruz Biotechnology                |
| <b>BRACHYURY</b>  | Rabbit         | 1:100 (ICC)        | SC-20109           | Santa-Cruz Biotechnology                |
| <b>CDX2</b>       | Mouse          | 1:500 (ICC)        | MU392AUC           | Biogenex                                |
| <b>FOXA2</b>      | Rabbit         | 1:500 (ICC)        | WRAB-1200          | Seven Hills Bioreagents                 |
| <b>pSMAD1/5</b>   | Rabbit         | 1:100 (ICC)        | 9516S              | Cell Signaling Technology               |
| <b>MSX1</b>       | Rabbit         | 1:500 (ICC)        | NBP2-30052         | Novus Biologicals                       |
| <b>SOX17</b>      | Goat           | 1:500 (ICC)        | AF1924             | R&D Systems                             |

179

180

181 **Supplementary Table 2. List of qRT-PCR primers.**

| <b>Gene</b>          | <b>Primer Sequences (5' -&gt; 3')</b> | <b>Reference</b>                 |
|----------------------|---------------------------------------|----------------------------------|
| <b><i>SOX2</i></b>   | <i>Forward:</i> GCTTAGCCTCGTCGATGAAC  | <i>NA</i>                        |
|                      | <i>Reverse:</i> AACCCCAAGATGCACAACCTC | <i>NA</i>                        |
| <b><i>GAPDH</i></b>  | <i>Forward:</i> CTCTGCTCCTCCTGTTCGAC  | <i>NA</i>                        |
|                      | <i>Reverse:</i> TTAAAAGCAGCCCTGGTGAC  | <i>NA</i>                        |
| <b><i>GATA3</i></b>  | <i>Forward:</i> GCCCCTCATTAAGCCCAAG   | PrimerBank <sup>6</sup>          |
|                      | <i>Reverse:</i> TTGTGGTGGTCTGACAGTTCG | PrimerBank                       |
| <b><i>TFAP2A</i></b> | <i>Forward:</i> GCATATCCGTTACGCCGAT   | Tadeu <i>et al.</i> <sup>7</sup> |
|                      | <i>Reverse:</i> GGGAGATTGACCTACAGTGCC | Tadeu <i>et al.</i> <sup>7</sup> |

182 *NA*: not applicable.

183

184

185

186 **Supplementary References**

- 187 1. Shao, Y., *et al.* Self-organized amniogenesis by human pluripotent stem cells in a biomimetic  
188 implantation-like niche. *Nature Mater.* **16**, 419-425 (2017).
- 189 2. Hertig, A. T. and Rock, J. Two human ova of the pre-villous stage, having a development age of  
190 about eight and nine days respectively. *Contributions to Embryology* Carnegie Institution of Washington,  
191 **33**, (1945).
- 192 3. Hertig, A. T. and Rock, J. Two human ova of the pre-villous stage, having a development age of  
193 about seven and nine days respectively. *Contributions to Embryology* Carnegie Institution of  
194 Washington, **31**, (1949).
- 195 4. Hertig, A. T. and Rock, J. Two human ova of the pre-villous stage, having an ovulation age of about  
196 eleven and twelve days respectively. *Contributions to Embryology* Carnegie Institution of Washington,  
197 **29**, (1941).
- 198 5. McCracken, K. W., Howell, J. C., Wells, J. M. and Spence, J. R. Generating human intestinal tissue  
199 from pluripotent stem cells in vitro. *Nat. Protoc.* **6**, 1920-1928 (2011).
- 200 6. Wang, X. W., Spandidos, A., Wang, H. J. and Seed, B. PrimerBank: A PCR primer database for  
201 quantitative gene expression analysis, 2012 update. *Nucleic. Acids. Res.* **40**, D1144-D1149 (2012).
- 202 7. Tadeu, A. M. B., *et al.* Transcriptional profiling of ectoderm specification to keratinocyte fate in  
203 human embryonic stem cells. *PLoS One* **10**, e0122493 (2015).

204
